# Supplementary material for: 153 幼稚園現場は新採用教員にどのような資質や能力を求めているか : 近畿 2 府 4 県の私立幼稚園へのアンケート調査から
Source: Royal Society of Chemistry journal article supplement (doi:10.1039/c0an01046d), 2003-05-17
Supplement: c0an01046d.pdf [file c0an01046d.pdf]

## Supporting Information:

# Nanodiamond-Based Two-Step Sampling of Multiply and Singly Phosphorylated Peptides for MALDI-TOF Mass Spectrometry Analysis.

Kai Jung Shiau, Shain-Un Hung, Hsiao-Wen Lee and Chih-Che Wu<sup>\*</sup>

*Department of Applied Chemistry, National Chi Nan University, Puli, Nantou 545, Taiwan.*

**Preparation of PA-coated and TiO<sub>2</sub>-coated NDs.** Abrasive diamond powders with sizes in the range of 100 nm were purified in concentrated H<sub>2</sub>SO<sub>4</sub>-HNO<sub>3</sub> mixture (3:1, v/v) at 100 °C in a microwave reactor (Discover BenchMate, CEM) for 3 h, after which the diamond nanoparticles were rinsed extensively with deionized water and recovered by centrifugation. PA-coated NDs were prepared by a carbodiimide-based cross-linking method for covalent conjugation of poly-L-arginine (PA) with the carboxyl groups on the oxidized ND surfaces, following previous reported procedures.<sup>31</sup> This was made by mixing an EDC solution (22 mg/mL, 63.7 μL), a PA solution (4 mg/mL, 155 μL), and the acid-treated NDs (1 mg) together in 5 mM H<sub>3</sub>BO<sub>3</sub>/NaOH buffer (pH 8.5). The mixture was shaken gently at room temperature for 2 h. The resulting PA-coated NDs were recovered by centrifugation,

washed thoroughly with deionized water, and prepared as a suspension at a concentration of 1 mg/mL.

TiO<sub>2</sub>-coated NDs were prepared by a two-step sol-gel reaction route, as proposed by Chen *et al.*<sup>38</sup> Briefly, 26 mL of 1.0 M BH<sub>3</sub>-THF were added dropwise with stirring to a suspension of 500 mg acid-treated NDs in 30 mL of dry THF. The mixture was refluxed for 24 h, hydrolysed with 1 N HCl later, cooled to r.t. until the hydrogen development ended. The hydroxylated NDs were thoroughly washed with water until pH 7 and isolated by centrifugation. Reduction NDs (300mg) were suspended in ethanol (10 mL) under sonication. Ammonia (30%, 14 mL), tetraethyl orthosilicate (0.2 mL), and water (11 mL) were added sequentially to the particle suspension. The mixture was stirred vigorously for 2 h in a bath sonicator at 40°C, followed by sonication for 1 h. The SiO<sub>2</sub>-coated NDs were thoroughly washed with ethanol, recovered by centrifugation, and resuspended in ethanol (6 mL). The suspension was heated under reflux at 60°C for 12 h to strengthen the adhesion of SiO<sub>2</sub> to the surfaces of the particles. The SiO<sub>2</sub>-coated NDs were collected by centrifugation and were resuspended in ethanol (6 mL), followed by sonication for 1 h. Ethanol (50 mL) and water (0.15 mL) were added into this solution, which was then subjected to vortex-mixing for 15 min. Subsequently, the suspension was mixed with a solution of ethanol (13 mL) and titanium butoxide (0.15 mL) and then stirred vigorously at 45°C for 4 h, followed by sonication for 1 h. When the reaction was complete, and TiO<sub>2</sub>-coated NDs were collect by

centrifugation, cleaned with ethanol (3 x 3.0 mL) and with H<sub>2</sub>O (3 x 3.0 mL), and were resuspended in H<sub>2</sub>O (6 mL). The suspension was heated under reflux at 60°C for 12 h to strengthen the adhesion of TiO<sub>2</sub> to the surfaces of the particles. The TiO<sub>2</sub>-coated NDs were collected by centrifugation, and resuspended in H<sub>2</sub>O at a concentration of 1.0 mg/mL before use.

### **Enrichment of Phosphopeptides using commercial TiO<sub>2</sub> beads and Fe<sup>3+</sup>-IMAC beads**

Fe<sup>3+</sup>-IMAC and TiO<sub>2</sub> purification of phosphorylated peptides were performed according to manufacturer's instructions. For Fe<sup>3+</sup>-IMAC purification, the sample solution (1 μL) was mixed with 20 μL of binding solution and with 10 μL of commercial Fe<sup>3+</sup>-IMAC magnetic bead suspension provided by manufacturer. After incubation for 1 h, the Fe<sup>3+</sup>-IMAC magnetic beads were collected by magnetic separation, cleaned twice with 100 μL of washing solution provided by the manufacturer to remove unbound peptides. The phosphopeptides extracted by Fe<sup>3+</sup>-IMAC magnetic beads were then eluted from the particles with 3 μL of elution solution provided by the manufacturer. The elution solution was transferred into a fresh tube and vacuum dried. The eluted sample was then mixed with 1 μL of DHB (30 mg/mL) containing 5% phosphoric acid and 66% ACN and deposited on a MALDI plate for MS analysis. For TiO<sub>2</sub> purification, the sample solution (1 μL) was 10-fold diluted with binding buffer provided by the manufacturer and mixed with 10 μL of commercial TiO<sub>2</sub>

magnetic bead suspension. After incubation for 1 h, the TiO<sub>2</sub> magnetic beads were collected by magnetic separation, cleaned four times with 200  $\mu$ L of binding buffer provided by the manufacturer to remove unbound peptides. The phosphopeptides extracted by TiO<sub>2</sub> magnetic beads were then eluted from the particles with 10  $\mu$ L of elution buffer provided by the manufacturer. The elution solution was transferred into a fresh tube and vacuum dried. The eluted sample was then mixed with 1  $\mu$ L of DHB (30 mg/mL) containing 5% phosphoric acid and 66% ACN and deposited on a MALDI plate for MS analysis.

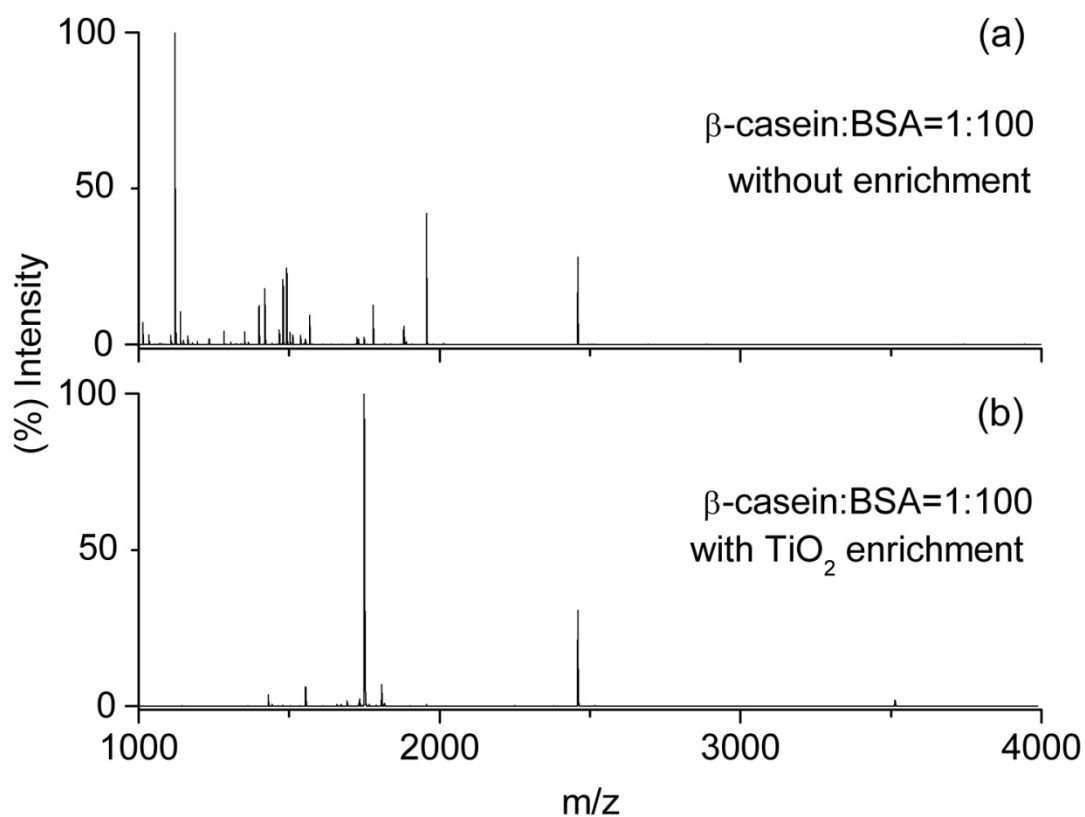

**Figure S1.** MALDI mass spectra of a tryptic digest of a mixture of  $\beta$ -casein (1 pmol) and BSA (100 pmol). The mass spectra were obtained by (a) direct analysis; (b) analysis using commercial TiO<sub>2</sub> beads;

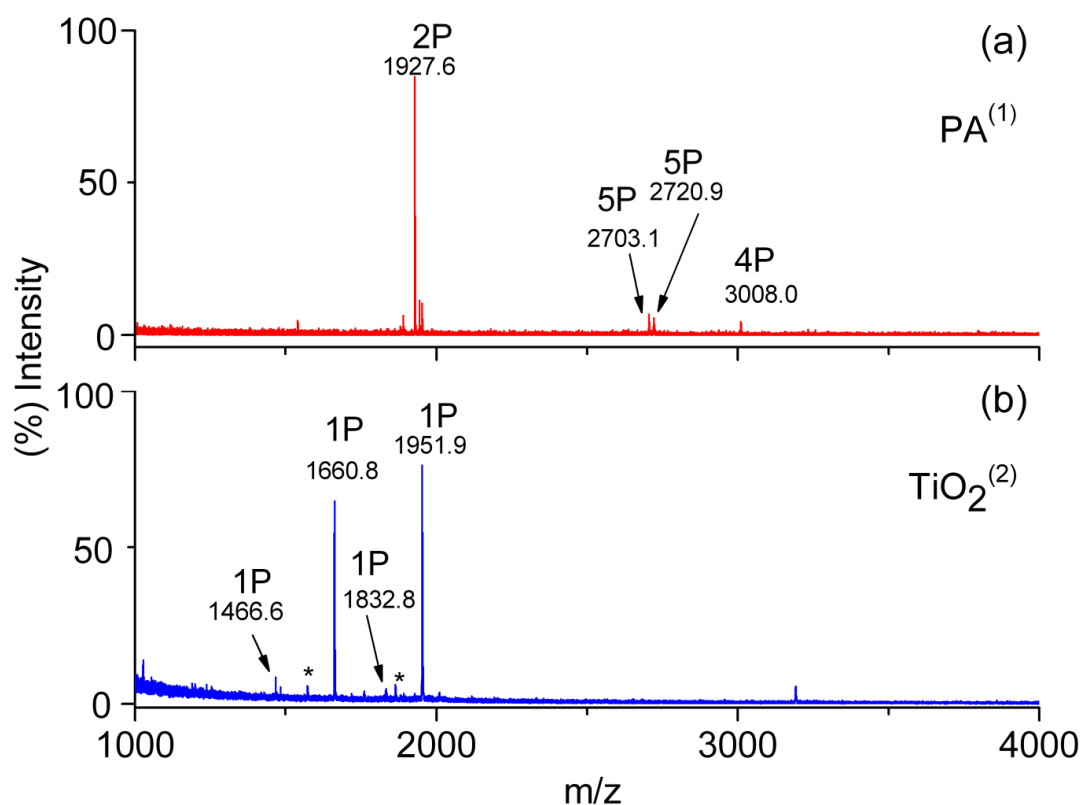

**Figure S2.** MALDI mass spectra of a tryptic digest of  $\beta$ -casein (1 pmol). (a) Analysis after isolation using PA-coated NDs; (b) analysis after successive isolation using TiO<sub>2</sub>-coated NDs. An asterisk indicates the loss of phosphoric acid, and “#P” denotes the number of phosphate group per peptide. The number in the parentheses denotes the number of the purification steps.

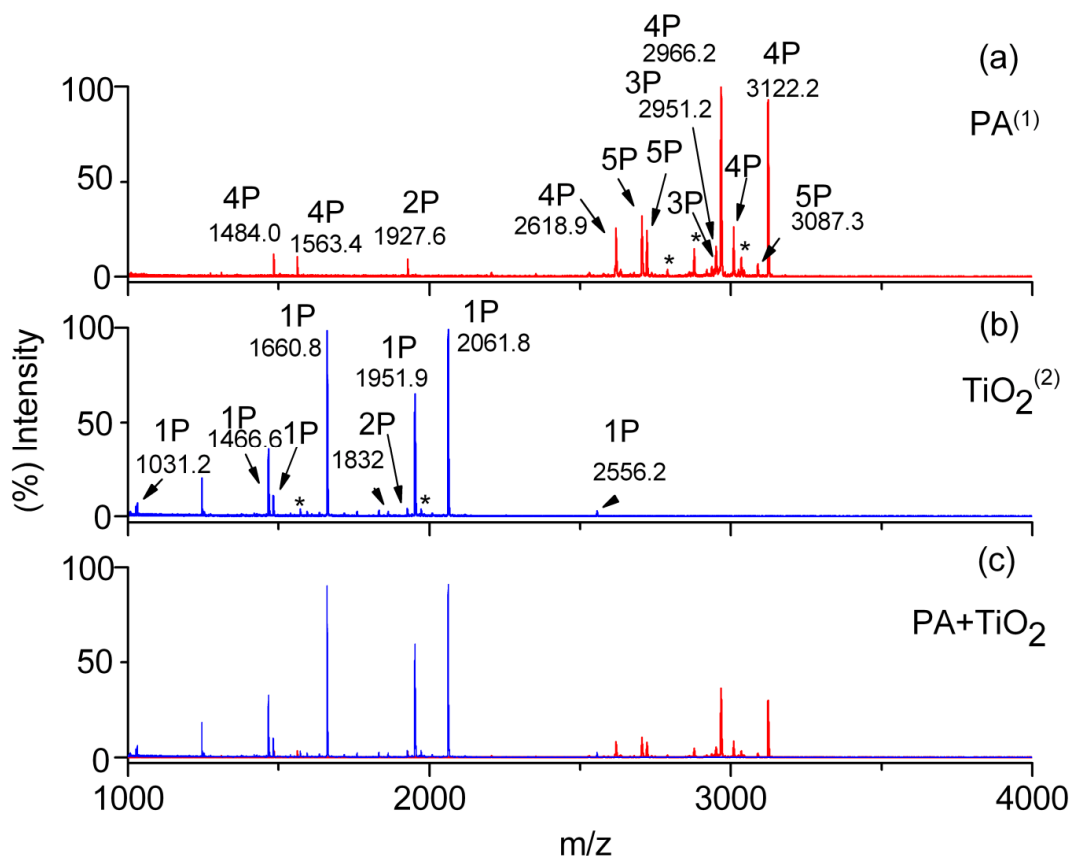

**Figure S3.** MALDI mass spectra of a tryptic digest of a tryptic digest of nonfat milk with an estimated casein concentration of  $2.33 \times 10^{-8}$  M (100  $\mu$ L). (a) Analysis after enrichment using PA-coated NDs; (b) Analysis after successive enrichment using TiO<sub>2</sub>-coated NDs; (c) An overlay of two mass spectra. An asterisk indicates the loss of phosphoric acid, and P denotes the number of phosphate group per peptide. The number in the parentheses denotes the number of purification steps.

**Table S1.** List of phosphorylated peptides identified from the tryptic digest of nonfat milk using the two-step isolation strategy. The phosphorylation sites are indicated in bold and underlined.

| Peptide sequence                                                                                             | Calculated<br><i>m/z</i> | Two-step isolation      |                                 |
|--------------------------------------------------------------------------------------------------------------|--------------------------|-------------------------|---------------------------------|
|                                                                                                              |                          | PA <sup>(1)</sup>       | TiO <sub>2</sub> <sup>(2)</sup> |
| TVDME <u>S</u> TEVFTK ( $\alpha$ -S2. 153–164)                                                               | 1466.6                   | <i>N/A</i> <sup>a</sup> | ++                              |
| VPQLEIVPNS <u>S</u> AEER ( $\alpha$ -S1. 121–134)                                                            | 1660.8                   | <i>N/A</i>              | ++                              |
| YLGEYLIVPNS <u>S</u> AEER ( $\alpha$ -S1. 104–119)                                                           | 1832.8                   | <i>N/A</i>              | ++                              |
| DIG <u>S</u> <u>E</u> STEDQAMEDIK ( $\alpha$ -S1. 58–73)                                                     | 1927.6                   | ++                      | ++                              |
| YKVPQLEIVPNS <u>S</u> AEER ( $\alpha$ -S1. 119–134)                                                          | 1951.9                   | <i>N/A</i>              | ++                              |
| FQ <u>S</u> EEQQQTEDELQDK ( $\beta$ . 33–48)                                                                 | 2061.8                   | <i>N/A</i>              | ++                              |
| FQ <u>S</u> EEQQQTEDELQDKIHPF ( $\beta$ . 33–52)                                                             | 2556.2                   | <i>N/A</i>              | ++                              |
| NTMEHV <u>S</u> <u>S</u> <u>S</u> EEESI <u>S</u> QETYK ( $\alpha$ -S2. 17–36)                                | 2618.9                   | ++                      | <i>N/A</i>                      |
| QMEAE <u>S</u> <u>I</u> <u>S</u> <u>S</u> <u>S</u> EEIVPNS <u>S</u> VEQK ( $\alpha$ -S1. 74–94) <sup>b</sup> | 2703.1                   | ++                      | <i>N/A</i>                      |
| QMEAE <u>S</u> <u>I</u> <u>S</u> <u>S</u> <u>S</u> EEIVPNS <u>S</u> VEQK ( $\alpha$ -S1. 74–94)              | 2720.9                   | ++                      | <i>N/A</i>                      |
| EKVNEL <u>S</u> KDIG <u>S</u> <u>E</u> STEDQAMEDIK ( $\alpha$ -S1. 50–73)                                    | 2935.1                   | ++                      | <i>N/A</i>                      |
| EKVNEL <u>S</u> KDIG <u>S</u> <u>E</u> STEDQAMEDIK ( $\alpha$ -S1. 50–73) <sup>c</sup>                       | 2951.2                   | ++                      | <i>N/A</i>                      |
| ELEELNVPGEIVES <u>L</u> <u>S</u> <u>S</u> <u>S</u> EEESITR ( $\beta$ . 17–30)                                | 2966.1                   | ++                      | <i>N/A</i>                      |
| NANEEEEYSIG <u>S</u> <u>S</u> <u>S</u> <u>S</u> EE <u>S</u> AEVATEEVK ( $\alpha$ -S2. 61–85)                 | 3008.0                   | ++                      | <i>N/A</i>                      |
| NANEEEEYSIG <u>S</u> <u>S</u> <u>S</u> <u>S</u> EE <u>S</u> AEVATEEVK ( $\alpha$ -S2. 61–85)                 | 3087.3                   | ++                      | <i>N/A</i>                      |
| RELEELNVPGEIVES <u>L</u> <u>S</u> <u>S</u> <u>S</u> EEESITR ( $\beta$ . 16–40)                               | 3122.2                   | ++                      | <i>N/A</i>                      |

<sup>a</sup> *N/A* denotes a peak *S/N* ratio less than 3; ++ denotes a peak *S/N* ratio over 10.

<sup>b</sup> pyroglutamate formation from N-terminal glutamine residue

<sup>c</sup> Oxidation of methionine residue

The phosphorylation sites are bold and underlined. The oxidized methionine is denoted by oM. The phosphorylated peptides were derived by tryptic digestion of  $\alpha$ -casein S1 ( $\alpha$ -S1) and S2 ( $\alpha$ -S2) and  $\beta$ -casein ( $\beta$ ).



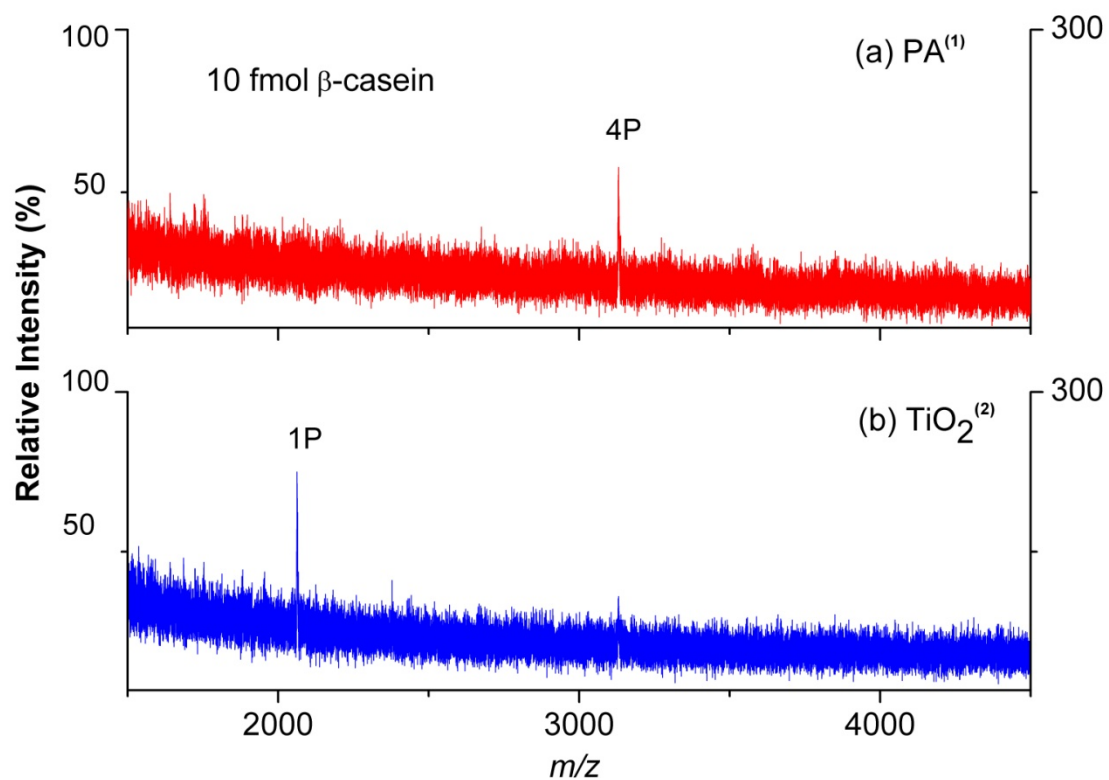

**Figure S4.** MALDI mass spectra of a tryptic digest of  $\beta$ -casein (10 fmol). (a) Analysis after isolation using PA-coated NDs; (b) analysis after successive isolation using TiO<sub>2</sub>-coated NDs. An asterisk indicates the loss of phosphoric acid, and “#P” denotes the number of phosphate group per peptide. The number in the parentheses denotes the number of the purification steps.

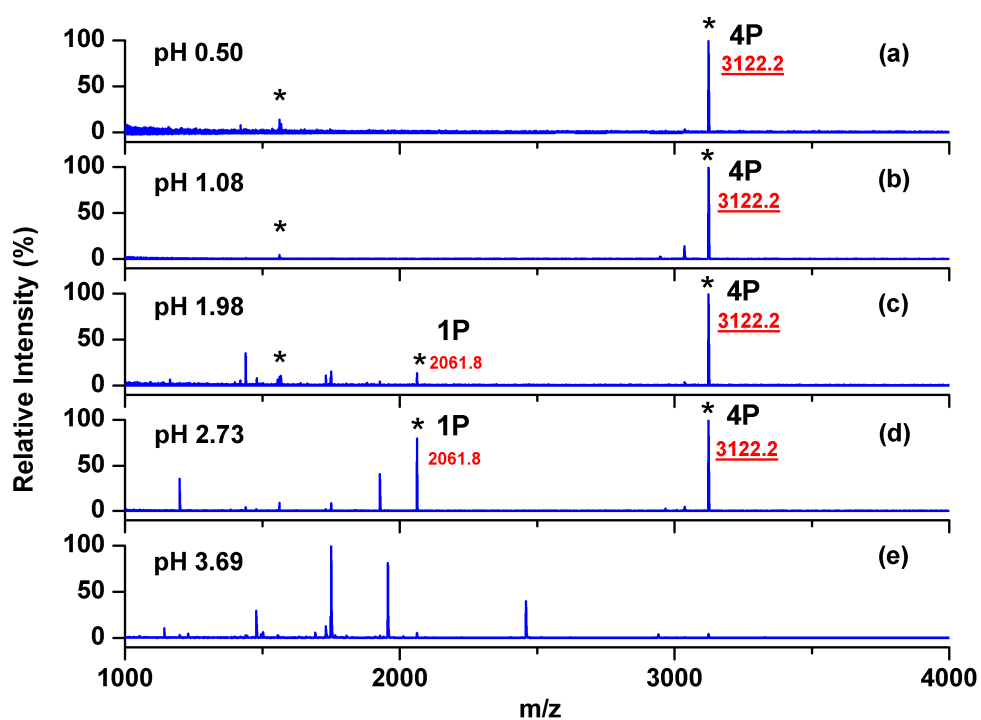

**Figure S5.** Effect of binding solution pH on the affinity of phosphopeptides for PA-coated NDs. MALDI-TOF mass spectra of a tryptic digest of  $\beta$ -casein (1.0 pmol) and BSA (100 pmol), extracted at (a) pH 0.5; 10% TFA (b) pH 1.08; 1% TFA, (c) pH 1.98; 0.1% TFA, (d) pH 2.73; 0.01% TFA, and (e) pH 3.69; 0.001% TFA with the ND treatment.
